1                   Phylogenetic analysis suggests joint control of  
2 transmission mode in a grass-endophyte symbiosis

3                   Alexandra Brown and Erol Akçay

                  Department of Biology

                  University of Pennsylvania

4                   November 4, 2016

5                   **Abstract**

6                   How symbionts are transmitted between hosts is key to determining whether sym-  
7 bioses evolve to be harmful or beneficial. Vertical transmission favors mutualistic sym-  
8 bionts, and horizontal transmission more virulent ones. Transmission mode evolution  
9 itself depends on whether the host or symbiont can respond to selection on transmis-  
10 sion mode. When hosts control the transmission mode, vertical transmission should  
11 evolve under more restrictive circumstances than when symbionts are in control. We  
12 take a phylogenetic approach to determine whether the host, symbiont, or both control  
13 transmission mode using the pooid grass-epichloid endophyte symbiosis as a model sys-  
14 tem. This study is the first to investigate control of transmission mode evolution in a  
15 phylogenetic context. We find a signal of host phylogeny but only in conjunction with  
16 symbiont identity. This pattern suggests joint control of transmission mode by the host  
17 and symbiont. It also suggests that non-genetic or non-conserved symbiont traits may  
18 determine whether host traits lead to vertical or horizontal transmission.

## 19 **1 Introduction**

20 Symbiotic relationships are ubiquitous and can have large impacts on the fitness of the host,  
21 symbiont, and organisms that interact with them [1, 2]. Understanding the evolution of  
22 symbiont virulence is therefore a matter of theoretical and practical interest. Transmission  
23 mode is a key factor in virulence evolution. Vertical transmission favors mutualists, and  
24 horizontal transmission parasites, assuming a positive relationship between virulence and  
25 horizontal transmission [3, 4] and in the absence of feedbacks selecting for mutualism [5, 6]  
26 or parasitism [7]. Transmission mode evolution may itself depend on whether hosts or  
27 symbionts can respond to selection on it [8]. We term this ability to respond to selection  
28 “control,” as selective pressures on the partner(s) in “control” determine the direction of  
29 transmission mode evolution. For example, in the case of parasitism, symbiont control may  
30 favor increased vertical transmission when host control does not. Despite its importance,  
31 there has been little work exploring the patterns of transmission mode evolution over the  
32 evolutionary history of extant symbioses.

33 In this paper, we show that a phylogenetic perspective can provide valuable insight  
34 into the control of transmission mode. In particular, we propose that if the variation in  
35 transmission mode in a given symbiosis maps onto the phylogeny of one of the partners, we  
36 can interpret it as that partner’s traits determining the transmission mode, i.e., that partner  
37 controls transmission mode. For example, if symbionts control transmission mode, related  
38 symbiont species should be more likely to employ the same transmission mode than unrelated  
39 species. If symbionts do not control transmission mode, then related symbionts should not  
40 be more likely than unrelated symbionts to employ the same transmission mode, because  
41 factors external to the symbionts determine the transmission mode. By looking at whether  
42 present-day transmission modes are correlated with host or symbiont evolutionary history,  
43 we may be able to understand which partner has controlled transmission mode evolution. In  
44 this paper, we show that this phylogenetic approach can give new insights into the question  
45 of control that can complement experimental approaches.

46 We study phylogenetic patterns of transmission mode in the symbiosis between cool-  
47 season grasses (subfamily Pooideae) and their fungal endophytes of the genus *Epichloë*. We  
48 chose this system because of its agricultural importance, the large amount of phylogenetic  
49 and transmission data available, and its variation in transmission mode [9, 10]. Previous  
50 work on this symbiosis has proposed host, coevolutionary, or symbiont control of transmis-  
51 sion mode. The vertical transmission rates of asexual *Epichloë* are higher than their generally  
52 more parasitic sexual relatives, suggesting host control of transmission mode [11]. However,  
53 the fact that most *Epichloë* species are horizontally transmitted only on a related subset  
54 of their hosts suggests that host-symbiont coevolution is necessary for horizontal transmis-  
55 sion to evolve, implying joint control of transmission mode [9]. Meijer and Leuchtman  
56 experimentally investigated control using genetic variation in the *Brachypodium sylvaticum*-  
57 *Epichloë sylvatica* symbiosis and found that symbiont genotype correlated with transmission  
58 mode, suggesting symbiont control [12]. To our knowledge, there has not been a phylogenetic  
59 study to determine control of transmission mode across multiple symbioses.

60 Using recently developed methods for estimating phylogenetic effects on joint traits of  
61 interacting species [13, 14], we find phylogenetic patterns that point towards joint control  
62 of transmission mode. In particular, we find an effect of host phylogeny conditional on  
63 the symbiont's identity. This effect, together with patterns inferred from simulated data,  
64 suggests that host traits and symbiont traits influence transmission mode, with symbiont  
65 traits evolving faster. This study is the first to investigate control of transmission mode  
66 evolution in a phylogenetic context. It points to a need for more transmission mode data to  
67 understand transmission and virulence evolution in symbioses of interest.

## 68 2 Methods

69 We determined control of transmission mode by the phylogenetic effects present in the trans-  
70 mission mode data. We consider five phylogenetic effects, each inducing a different corre-

71 lation between host-symbiont pairs [14, 13]. The host and symbiont effects indicate host  
72 and symbiont control, respectively, and cause related hosts (respectively, symbionts) to have  
73 similar probabilities of exhibiting a given transmission mode (Figure 1a-b). The other ef-  
74 fects indicate joint control. The coevolutionary effect (Figure 1c) causes two symbioses to  
75 be similar when both hosts and symbionts are related. It indicates that phylogenetically  
76 conserved factors in the host and symbiont interact to produce the transmission mode. The  
77 symbiont-specific host effect (Figure 1d) indicates that phylogenetically conserved host fac-  
78 tors interact with non-conserved symbiont factors. Related hosts have similar probabilities  
79 of exhibiting a transmission mode, but these probabilities change from symbiont to symbiont  
80 regardless of symbiont relatedness. The host-specific symbiont effect (Figure 1e) arises when  
81 non-conserved host factors interact with phylogenetically conserved symbiont traits.

82 We collected published phylogenetic and transmission data (Figure 2; supplement). We  
83 used Clann [15], Dendroscope [16], and the R [17] package APE [18], to combine the phyloge-  
84 nies into a supertree, removing species that appeared to have hybrid ancestry. We repeated  
85 the analysis using the two single phylogenies with the largest transmission data set. We  
86 assumed host-symbiont species pairs lacking transmission data did not form symbioses.

87 To simulate transmission mode data, we modified the code in [19]. We simulated each  
88 phylogenetic effect alone as well as a coevolutionary effect coupled with fast symbiont evo-  
89 lution. We simulated fast symbiont evolution by decreasing the correlations between related  
90 symbionts by a factor of 2 or 20. We re-analyzed simulated data with random transmission  
91 data removed to test the effect of missing data. For simulated and real data, we estimated  
92 phylogenetic effects with MCMCglmm [20] and analyzed posterior distributions with Coda  
93 [21].

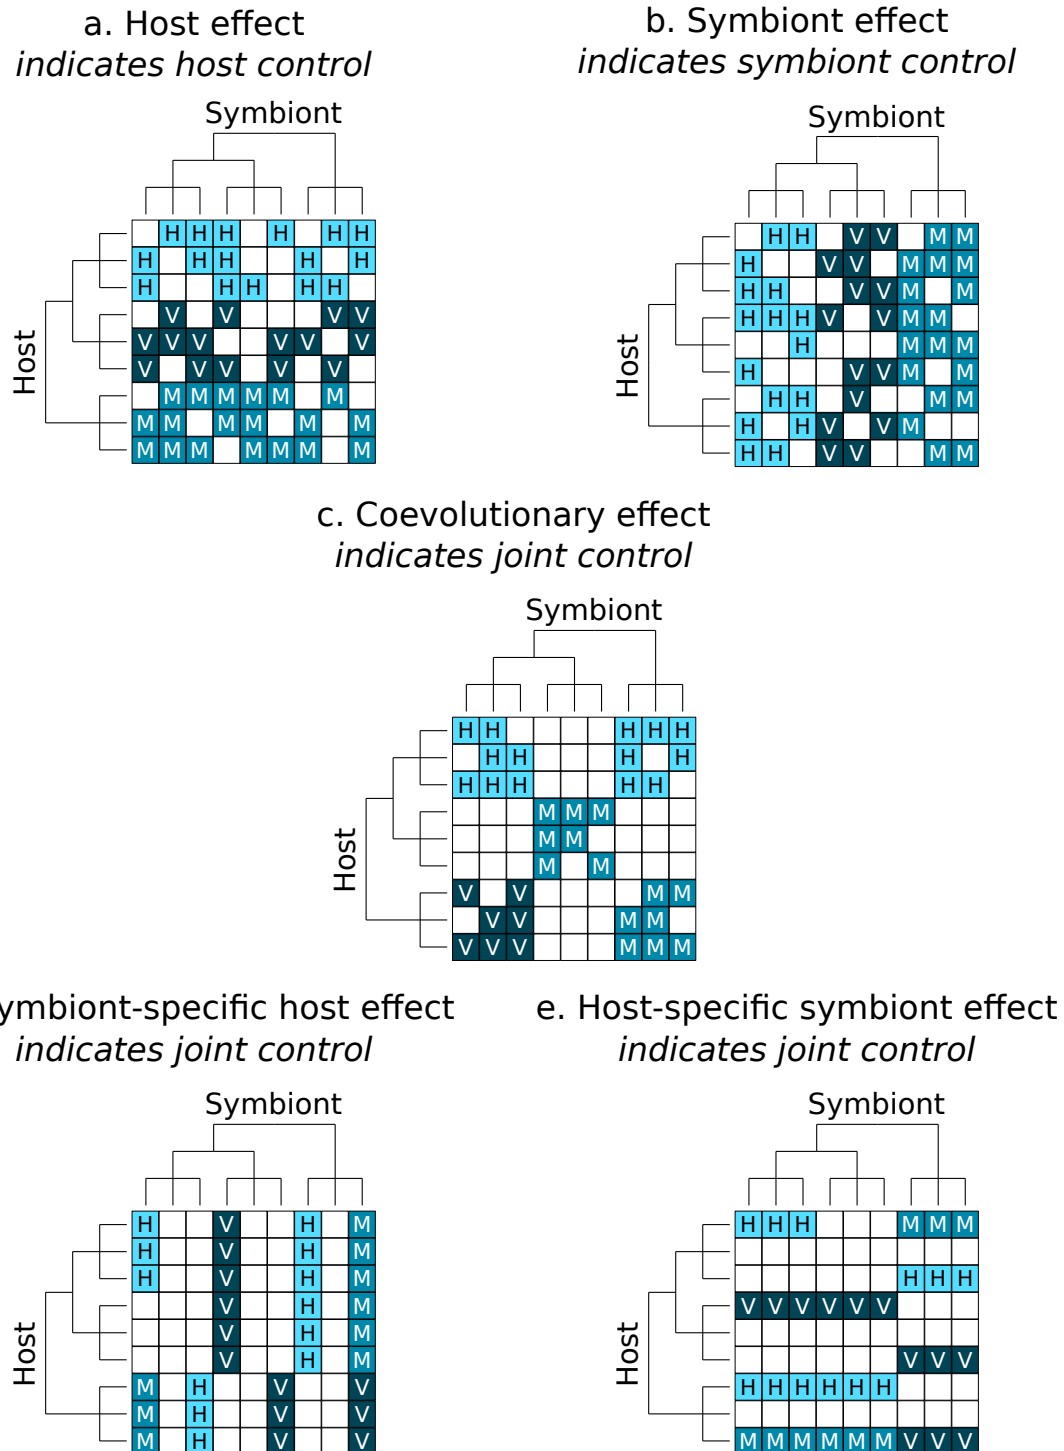

Figure 1: Example correlations induced by phylogenetic effects. Colored squares represent the transmission mode exhibited by host-symbiont pairs. H refers to horizontal transmission, M to mixed-mode, and V to vertical. Blank squares indicate the pair does not form a symbiosis. Host and symbiont phylogenies are shown on the left and top, respectively.

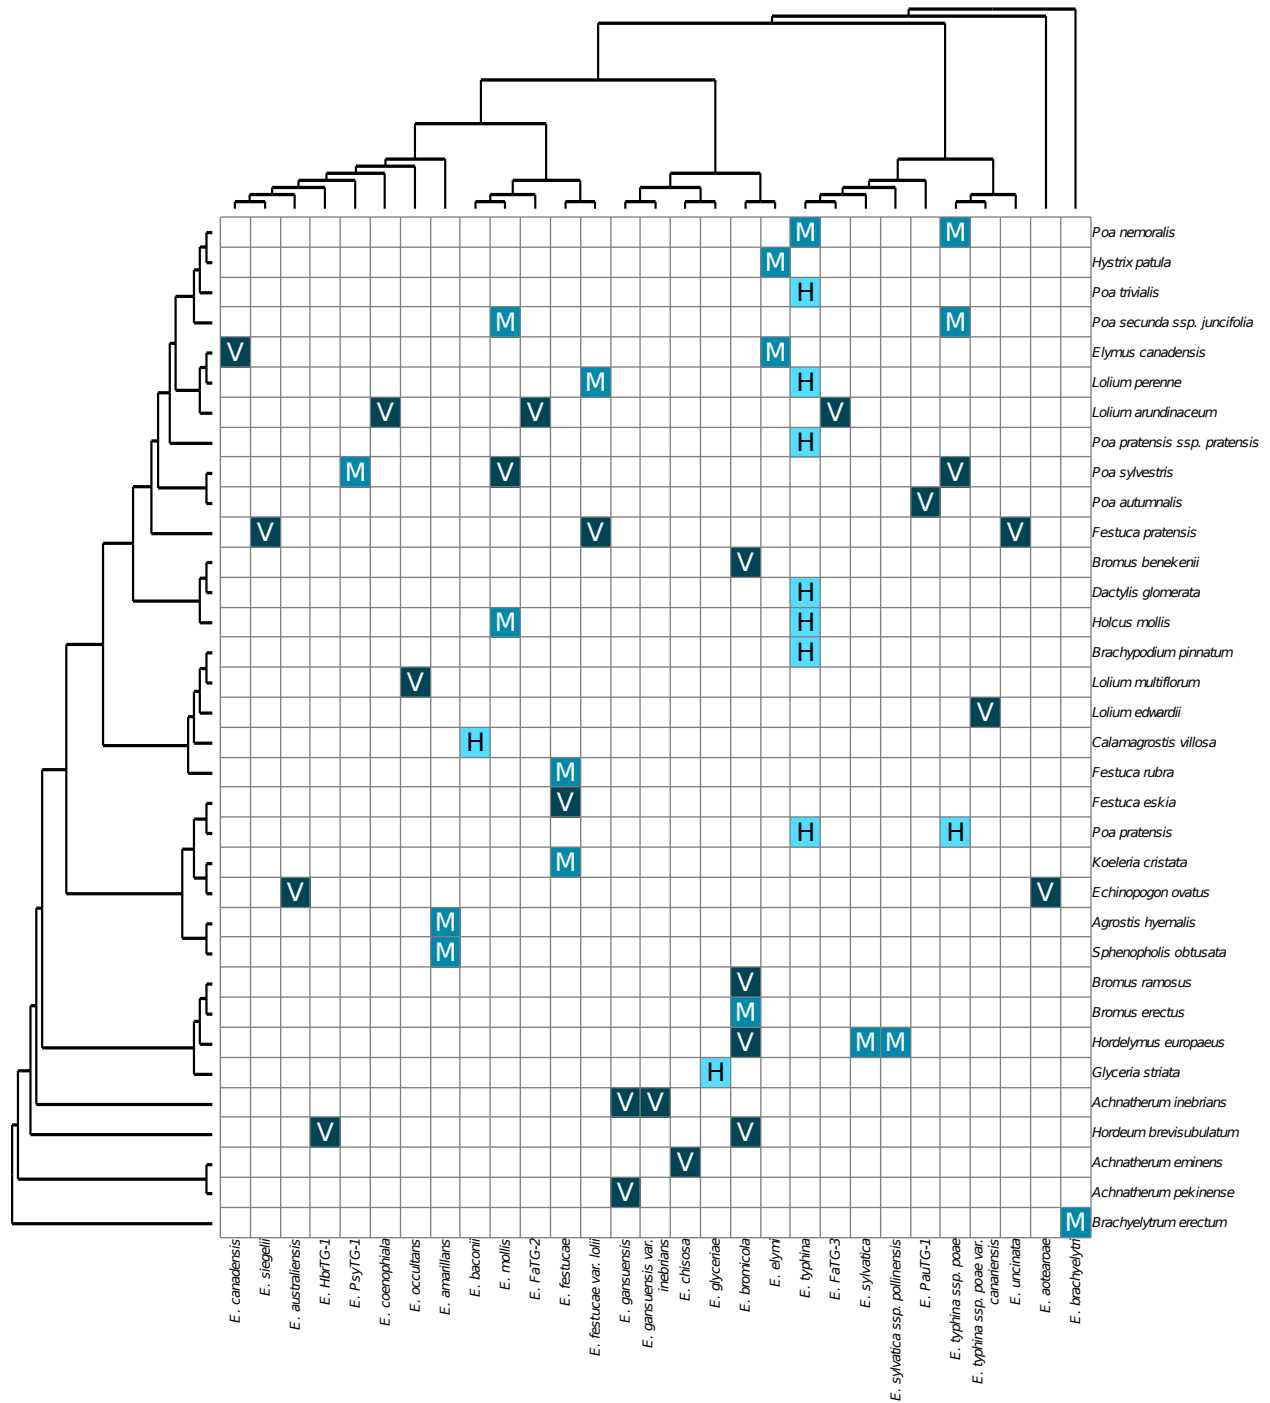

Figure 2: Phylogenetic and transmission mode data. Rows represent host species, columns symbiont species. Squares represent the transmission mode exhibited by a host-symbiont pair, as in Figure 1.

| <b>Phylogenetic Effect</b>    | <b>Intraclass Correlation</b> | <b>95% Credible Interval</b> |
|-------------------------------|-------------------------------|------------------------------|
| Host Effect                   | 0.001                         | (0.00, 0.03)                 |
| Symbiont Effect               | 0.001                         | (0.00, 0.07)                 |
| Coevolutionary Interaction    | 0.002                         | (0.00, 0.08)                 |
| Symbiont-Specific Host Effect | 0.12                          | (0.01, 0.27)                 |
| Host-Specific Symbiont Effect | 0.001                         | (0.00, 0.04)                 |

Table 1: Estimated Phylogenetic Effects

### 94 **3 Results**

95 We detected a symbiont-specific host effect. The posterior mode of its intraclass correlation  
96 (ICC) was 0.12 (12% of the total variance in transmission mode explained), with a 95% cred-  
97 ible interval of 1% to 27%. The host, symbiont, coevolutionary, and host-specific symbiont  
98 effects each explained no more than than 0.2% of the variance in transmission mode. The  
99 multivariate potential scale reduction factor [22] was 1.02. All effective sample sizes were >  
100 170. When we used data from only one host and one symbiont tree, the symbiont-specific  
101 host effect explained 11% of the variance. The other effects each explained < 0.4% of the  
102 variance (Table S5).

103 In three out of four simulations of coevolution with fast symbiont evolution, we detected  
104 a symbiont-specific host effect. In simulations of individual phylogenetic effects at normal  
105 evolutionary rates, we generally detected the simulated effects, except for the coevolutionary  
106 effect. We detected effects that we did not simulate in seven of fifteen simulations, although  
107 in all but two simulations they appeared to be small ( $ICC \leq 3\%$ ). In simulations of missing  
108 data, we never detected effects not found in the original simulated data set, although in  
109 seven of nine simulations we failed to detect effects found in the original data sets.

### 110 **4 Discussion**

111 We found that related hosts have similar probabilities of exhibiting a transmission mode,  
112 but their likelihood of exhibiting a particular transmission mode changes from symbiont to

113 symbiont in a way that cannot be predicted by symbiont relatedness. This suggests that host  
114 traits interact with non-genetic or other phylogenetically non-conserved symbiont traits to  
115 determine transmission mode. Our simulation results suggest that this effect can arise from  
116 coevolutionary control of transmission mode, if rapid evolution in the symbiont masks its  
117 phylogenetic signal. Thus, it is possible that there is coevolutionary control of transmission  
118 mode in the *Pooideae-Epichloë* symbiosis. In either case, our results point to joint control  
119 of transmission mode by the host and symbiont in this symbioses.

120 Studies of specific grass-endophyte symbioses provide independent support for joint con-  
121 trol. Within-species genetic variation in horizontal transmission rate has been found in sym-  
122 bionts in the *Pooideae-Epichloë* interaction [12] and in both partners in the closely related  
123 *Danthonia spicata-Balansia hypoxylon* symbiosis [23]. Furthermore, vertical transmission  
124 rate is phylogenetically conserved in some pooid grasses [24] and epichloid endophytes [25].  
125 Growth rate is a possible mechanism of transmission mode control. Horizontally-transmitted  
126 endophytes outpace vertically-transmitted on certain sugars [26], while fast-growing host in-  
127 florescences can prevent symbionts from transmitting horizontally [27].

128 Two factors may have affected our estimates. First, some transmission data may be miss-  
129 ing or inaccurate, given that new interactions are still being discovered [28]. Our simulations  
130 suggest that data missing completely at random rarely cause false positives (but may cause  
131 false negatives). However, non-random phylogenetic patterns in such missing interaction  
132 could change our estimates. Secondly, combining phylogenies from multiple sources may  
133 have affected our estimates of the covariance structures induced by the phylogenetic effects.  
134 This is particularly true for hybrid symbionts (e.g. *Epichloë melicicola*, which likely arose  
135 from the hybridization of the ancestors of *Epichloë aotearoae* and *Epichloë festucae*). We  
136 were only able to include hybrids when their relationship to one ancestor was missing. It  
137 is reassuring that our analysis using single phylogenies points in the same direction as the  
138 combined phylogenies.

139 One caveat in interpreting the phylogenetic effects is that phylogenetic effects might not



140 map directly onto proximate control of the joint phenotype. Suppose transmission mode is  
141 proximately under host control but evolves in response to benefits provided by the symbiont.  
142 Joint control combined with high host plasticity in transmitting different symbionts may leave  
143 only symbiont phylogenetic signal detectable. Therefore, experimental work is still needed to  
144 determine proximate control. Nonetheless, quantitative phylogenetic analyses provide useful  
145 insight into how joint traits evolve.

146 Our results support the hypothesis that transmission mode in the Pooideae-*Epichloë*  
147 symbiosis is evolving under the control of both partners, potentially with a faster rate of  
148 evolution for the symbionts. Our analysis illustrates the potential of phylogenetic analyses  
149 in addressing questions of control in the evolutionary history of species interactions.

## 150 **Competing Interests**

151 We have no competing interests.

## 152 **Funding**

153 AB was funded by the University of Pennsylvania and a DOD NDSEG fellowship.

## 154 **Acknowledgments**

155 We thank M. Levy for statistics advice and comments; J. Antonovics and M. Levine for  
156 comments on the manuscript; B. Koskella for comments and the scenario where plasticity  
157 masks joint control; and J. Rosario, J. Spitzer, and J. Van Cleve for computing assistance.

## 158 Authors' Contributions

159 EA and AB designed the analysis and simulations and wrote the manuscript. AB gathered  
160 data, wrote the simulations, and ran the analysis.

## 161 Keywords

162 “transmission mode”, “phylogenetic effects”, *Epichloë*, “control transmission mode”

## 163 References

- 164 [1] Keith Clay and Jenny Holah. Fungal endophyte symbiosis and plant diversity in  
165 successional fields. *Science*, 285(5434):1742–1744, 1999. doi:  
166 10.1126/science.285.5434.1742.
- 167 [2] Abigail A R Kula, David C Hartnett, and Gail W T Wilson. Effects of mycorrhizal  
168 symbiosis on tallgrass prairie plant–herbivore interactions. *Ecol. Lett.*, 8(1):61–69,  
169 2005. doi: 10.1111/j.1461-0248.2004.00690.x.
- 170 [3] Paul W. Ewald. Transmission modes and evolution of the parasitism-mutualism  
171 continuum. *Ann. N. Y. Acad. Sci.*, 503(1):295–306, 1987. doi:  
172 10.1111/j.1749-6632.1987.tb40616.x.
- 173 [4] S. Alizon, A. Hurford, N. Mideo, and M. Van Baalen. Virulence evolution and the  
174 trade-off hypothesis: history, current state of affairs and the future. *J. Evol. Biol.*, 22  
175 (2):245–259, 2009. doi: 10.1111/j.1420-9101.2008.01658.x.
- 176 [5] Erol Akçay. Evolutionary models of mutualism. In Judith L Bronstein, editor,  
177 *Mutualism*, pages 57–76. Oxford University Press, 2015.

- 178 [6] Jason W. Shapiro and Paul E. Turner. The impact of transmission mode on the  
179 evolution of benefits provided by microbial symbionts. *Ecol. Evol.*, 4(17):3350–3361,  
180 2014. doi: 10.1002/ece3.1166.
- 181 [7] John H. Werren, Laura Baldo, and Michael E. Clark. Wolbachia: master manipulators  
182 of invertebrate biology. *Nature Rev. Microbiol.*, 6(10):741–751, 2008. doi:  
183 10.1038/nrmicro1969.
- 184 [8] Norio Yamamura. Vertical transmission and evolution of mutualism from parasitism.  
185 *Theor. Popul. Biol.*, 44(1):95–109, 1993. doi: 10.1006/tpbi.1993.1020.
- 186 [9] Christopher L. Schardl. The epichloae, symbionts of the grass subfamily poöideae.  
187 *Ann. Missouri Bot. Gard.*, 97(4):646–665, 2010. doi: 10.3417/2009144.
- 188 [10] M. Tadych, M. S. Bergen, and J. F. White. Epichloe spp. associated with grasses: new  
189 insights on life cycles, dissemination and evolution. *Mycologia*, 106(2):181–201, 2014.  
190 doi: 10.3852/106.2.181.
- 191 [11] Jennifer A. Rudgers, Michelle E. Afkhami, Megan A. Rúa, Andrew J. Davitt,  
192 Samantha Hammer, and Valérie M. Huguet. A fungus among us: broad patterns of  
193 endophyte distribution in the grasses. *Ecology*, 90(6):1531–1539, 2009. doi:  
194 10.1890/08-0116.1.
- 195 [12] G. Meijer and A. Leuchtman. Fungal genotype controls mutualism and sex in  
196 brachyposium sylvaticum infected by epichloë sylvatica. *Acta Biol. Hung.*, 52(2):  
197 249–263, 2001. doi: 10.1556/ABiol.52.2001.2-3.9.
- 198 [13] Nicole E. Rafferty and Anthony R. Ives. Phylogenetic trait-based analyses of  
199 ecological networks. *Ecology*, 94(10):2321–2333, 2013. doi: 10.1890/12-1948.1.
- 200 [14] Jarrod D. Hadfield, Boris R. Krasnov, Robert Poulin, and Shinichi Nakagawa. A tale

- 201 of two phylogenies: Comparative analyses of ecological interactions. *Am. Nat.*, 183(2):  
202 174–187, 2014. doi: 10.1086/674445.
- 203 [15] C. J. Creevey and J. O. McInerney. Clann: investigating phylogenetic information  
204 through supertree analyses. *Bioinformatics*, 21(3):390–392, 2005.
- 205 [16] D. H. Huson and C. Scornavacca. Dendroscope 3: An interactive tool for rooted  
206 phylogenetic trees and networks. *Syst. Biol.*, 61(6):1061–1067, 2012. doi:  
207 10.1093/sysbio/sys062.
- 208 [17] R Core Team. *R: A Language and Environment for Statistical Computing*. R  
209 Foundation for Statistical Computing, 2015.
- 210 [18] E. Paradis, J. Claude, and K. Strimmer. APE: Analyses of phylogenetics and  
211 evolution in r language. *Bioinformatics*, 20(2):289–290, 2004. doi:  
212 10.1093/bioinformatics/btg412.
- 213 [19] Hadfield, Jarrod D., Krasnov, Boris R., Poulin, Robert, and Nakagawa, Shinichi. Data  
214 from: A tale of two phylogenies: comparative analyses of ecological interactions, 2013.
- 215 [20] Jarrod D. Hadfield. MCMC methods for multi-response generalized linear mixed  
216 models: The MCMCglmm r package. *J. Stat. Softw.*, 33(2), 2010. doi:  
217 10.18637/jss.v033.i02.
- 218 [21] Martyn Plummer, Nicky Best, Kate Cowles, and Karen Vines. CODA: Convergence  
219 diagnosis and output analysis for MCMC. *R News*, 6(1):7–11, 2006.
- 220 [22] Stephen P. Brooks and Andrew Gelman. General methods for monitoring convergence  
221 of iterative simulations. *J. Comput. Graph. Stat.*, 7(4):434–455, 1998. doi:  
222 10.1080/10618600.1998.10474787.
- 223 [23] P. X. Kover and K. Clay. Trade-off between virulence and vertical transmission and

- 224 the maintenance of a virulent plant pathogen. *Am. Nat.*, 152(2):165–175, 1998. doi:  
225 10.1086/286159.
- 226 [24] Walid Naffaa, Claude Astier, Catherine Ravel, and Jean-Jacques Guillaumin. Creation  
227 of stable associations between perennial ryegrass or tall fescue and fungal endophytes.  
228 *Agronomie*, 19(2):133–144, 1999. doi: 10.1051/agro:19990206.
- 229 [25] Erika Bucheli and Adrian Leuchtman. Evidence for genetic differentiation between  
230 choke-inducing and asymptomatic strains of the epichloe grass endophyte from  
231 brachypodium sylvaticum. *Evolution*, 50(5):1879, 1996. doi: 10.2307/2410746.
- 232 [26] James F. White, Angela C. Morrow, Gareth Morgan-Jones, and Donald A. Chambless.  
233 Endophyte-host associations in forage grasses. XIV. primary stromata formation and  
234 seed transmission in epichloe typhina: Developmental and regulatory aspects.  
235 *Mycologia*, 83(1):72, 1991. doi: 10.2307/3759833.
- 236 [27] E.J.M. Kirby. Host-parasite relations in the choke disease of grasses. *T. Brit. Mycol.*  
237 *Soc.*, 44(4):493–IN3, 1961. doi: 10.1016/S0007-1536(61)80048-X.
- 238 [28] Barbara Wiewióra, Grzegorz Żurek, and Dariusz Pańka. Is the vertical transmission of  
239 neotyphodium lolii in perennial ryegrass the only possible way to the spread of  
240 endophytes? *PLOS ONE*, 10(2):e0117231, 2015. doi: 10.1371/journal.pone.0117231.

# Supplement

## 1 Methods

### 1.1 Transmission Mode Data

We collected transmission mode data from published studies. We searched Web of Science using the following search terms: (*neotyphodium* OR *epichloe*) AND ('transmission mode' OR 'horizontal transmission' OR 'vertical transmission' OR 'mixed-mode transmission' OR 'mixed mode transmission' OR 'pleiotropic symbiosis'). (Asexual species in *Epichloë* were formerly in the genus *Neotyphodium*). This returned 65 papers. After discarding 18 papers whose abstracts indicated that they were unlikely to contain transmission mode data, we gathered transmission mode data from the remaining papers. We obtained transmission mode data from 32 papers [references 1–32]. 15 additional papers did not have any transmission mode data.

We recorded transmission mode as horizontal transmission, vertical transmission, mixed-mode transmission, or no transmission for each pair of host and symbiont species. A species pair was recorded as employing horizontal transmission if this was the only transmission mode reported for the pair. Similarly, vertical transmission was recorded when this was the only reported transmission mode for the species pair. A species pair was recorded as exhibiting mixed-mode transmission if it was reported to show both vertical and horizontal transmission. If no transmission data was available for a species pair, we recorded the pair as not forming a symbiosis.

Because horizontal transmission occurs via the dispersal of ascospores (although recent evidence suggests sexual reproduction is not always necessary for horizontal transmission [18, 32, 33]), a report that a symbiont was capable of reproducing sexually on a host was considered to be evidence of horizontal transmission.

### 1.2 Phylogenetic Data

We gathered phylogenetic data from TreeBASE. We used the “All text” search option and searched for the genera of the host and symbiont species in the transmission mode data set. The search terms we used are given in Table 1. Because asexual *Epichloë* were previously members of the genus *Neotyphodium*, we also used *Neotyphodium* as a search term. Furthermore, we appended a space when searching for members of the genus *Poa* to reduce irrelevant results.

Table 1: TreeBASE Search Terms

|                      | <b>Search Terms</b>                                                                                                                                                                                                                                                                                                                                                                                                                                     |
|----------------------|---------------------------------------------------------------------------------------------------------------------------------------------------------------------------------------------------------------------------------------------------------------------------------------------------------------------------------------------------------------------------------------------------------------------------------------------------------|
| Host phylogenies     | “Pooideae”; “Achnatherum”; “Agrostis”; “Ammophia”; “Anthoxanthum”; “Avena”; “Brachyelytrum”; “Brachypodium”; “Bromus”; “Calamagrostis”; “Cinna”; “Dactylis”; “Echinopogon”; “Elymus”; “Festuca”; “Glyceria”; “Holcus”; “Hordelymus”; “Hordeum”; “Hystrix”; “Koeleria”; “Leymus”; “Lolium”; “Melica”; “Miliium”; “Phleum”; “Poa ” [a space was appended to prevent return of results related only to Poacea]; “Puccinellia”; “Roegneria”; “Sphenopholis” |
| Symbiont phylogenies | “Epichloe”; “Epichlo*”; “Neotyphodium”                                                                                                                                                                                                                                                                                                                                                                                                                  |

We used the R package APE [34] to remove species not present in the transmission mode data set from the trees. We deleted any trees with fewer than two species in the transmission mode data set. Because the host tree search results contained some endophyte phylogenies, we deleted any host search results that contained endophyte species. The host and symbiont phylogenies we used in the analysis are given in Tables 2 and 3, respectively.

Some phylogenies had multiple tips corresponding to the same species. We used Dendroscope’s “MUL to Network, Cluster-based” algorithm [35] to merge those species that were present twice or more in a single tree. The algorithm indicated a hybrid origin for some symbiont species. These were deleted from the trees in which they appeared to be hybrids, because we were unable to use phylogenetic networks for further analysis. To maintain as much phylogenetic information as possible, we did not delete these species from trees in which the the algorithm did not indicate a hybrid origin.

### 1.2.1 Supertree Analysis

We used Clann [36] to find a set of equally probable host and symbiont supertrees from the trees produced merging identical tips and removing hybrids. We used the “Sub-tree Pruning and Regrafting” search algorithm, the “Most Similar Supertree” criterion, with the maximum number of steps as 3, the maximum number of swaps as 1,000,000, and 10 repetitions of the search. We used the comparisons weighting scheme and started from a neighbor-joining tree found from the average consensus distances. Missing data were estimated using the 4 point condition distances.

We combined the equally probable supertrees into a single majority consensus tree with Dendroscope’s “MUL to Network, Cluster-based” algorithm. We used these majority consensus supertrees for the main phylogenetic effects analysis.

Table 2: Host Phylogenetic Trees

| StudyID | TreeID                                                 | Reference |
|---------|--------------------------------------------------------|-----------|
| S10359  | Tr7298, Tr7299, Tr7300, Tr7301, Tr7302, Tr7303, Tr7304 | [38]      |
| S1146   | Tr1766, Tr1767, Tr1768                                 | [39]      |
| S1304   | Tr2052                                                 | [40]      |
| S133    | Tr434                                                  | [41]      |
| S16524  | Tr78544, Tr79376 [42]                                  |           |
| S179    | Tr4245                                                 | [43]      |
| S187    | Tr4265                                                 | [44]      |
| S2024   | Tr5125                                                 | [37]      |
| S205    | Tr4306, Tr4307, Tr4308                                 | [45]      |
| S786    | Tr3894, Tr3895                                         | [46]      |

### 1.2.2 Single Tree Analysis

To test the effect of combining multiple phylogenetic trees in the analysis, we also estimated phylogenetic effects using the individual phylogenetic trees with the largest overlap with the transmission data set (Figure 1. These were T5125 for the hosts and T362 for the symbionts, both from Schardl et al. [37]. Species not present in the transmission mode data set were removed from both trees. The trees were then ultrametricized. They and the transmission data for the species in them were then used to estimate phylogenetic effects.

### 1.3 Model of Phylogenetic Effects

In our data set, transmission mode is a categorical trait that can take on four possible values (horizontal transmission, vertical transmission, mixed-mode transmission, and no transmission). Currently, there is no method for estimating host and symbiont phylogenetic effects directly from categorical data. Thus, we modeled transmission mode for each host-symbiont pair as a 3-dimensional binary trait, following the recommendation of Hadfield and Nakagawa for estimating phylogenetic effects on categorical traits [68]. We modeled phylogenetic effects as covariances induced between the logarithms of the probabilities of each species pair expressing a given transmission mode [69, 70].

Briefly, suppose there are  $n$  hosts and  $m$  symbionts. Define the  $n \times m$  matrix  $Y_{HT}$  as

$$(Y_{HT})_{ij} = \log \left( \frac{\text{Prob}(\text{host } i\text{-symbiont } j \text{ pair uses horizontal transmission})}{\text{Prob}(\text{Pair does not form symbiosis})} \right) - 1$$

Define  $Y_{MMT}$  and  $Y_{VT}$  similarly for mixed-mode and vertical transmission. Then let

$$Y = \begin{bmatrix} \text{vec}(Y_{HT}) & \text{vec}(Y_{MMT}) & \text{vec}(Y_{VT}) \end{bmatrix}$$



Table 3: Symbiont Phylogenetic Trees

| StudyID | TreeID                                                                                                                                                                                                                                                                                                                                                        | Reference |
|---------|---------------------------------------------------------------------------------------------------------------------------------------------------------------------------------------------------------------------------------------------------------------------------------------------------------------------------------------------------------------|-----------|
| S10058  | Tr6159, Tr6326                                                                                                                                                                                                                                                                                                                                                | [47]      |
| S10445  | Tr8645, Tr8646, Tr8647, Tr8648, Tr8649, Tr8650, Tr8651, Tr8652, Tr8653, Tr8654, Tr8655, Tr8656, Tr8657, Tr8658, Tr8659, Tr8660, Tr8661, Tr8662, Tr8663, Tr8664, Tr8665, Tr8666, Tr8667, Tr8668, Tr8669, Tr8670, Tr8671, Tr8672                                                                                                                                | [48]      |
| S11124  | Tr26497, Tr26498                                                                                                                                                                                                                                                                                                                                              | [49]      |
| S11818  | Tr61850, Tr61851                                                                                                                                                                                                                                                                                                                                              | [50]      |
| S1196   | Tr4399, Tr4400                                                                                                                                                                                                                                                                                                                                                | [51]      |
| S12041  | Tr49151, Tr49152, Tr49153, Tr49154, Tr49155, Tr49156, Tr49157, Tr49158, Tr49159, Tr49160, Tr49161, Tr49162, Tr49163, Tr49164, Tr49165, Tr49166, Tr49167, Tr49168, Tr49169, Tr49170, Tr49171, Tr49172, Tr49173, Tr49174, Tr49175, Tr49176, Tr49177, Tr49178, Tr49179, Tr49180, Tr49181, Tr49182, Tr49183, Tr49184, Tr49185, Tr49186, Tr49187, Tr49188, Tr49189 | [52]      |
| S12265  | Tr50541, Tr50548                                                                                                                                                                                                                                                                                                                                              | [53]      |
| S12583  | Tr52106, Tr52107                                                                                                                                                                                                                                                                                                                                              | [54]      |
| S12959  | Tr54788, Tr54789, Tr60767                                                                                                                                                                                                                                                                                                                                     | [55]      |
| S13399  | Tr57323                                                                                                                                                                                                                                                                                                                                                       | [56]      |
| S1367   | Tr2138, Tr2139                                                                                                                                                                                                                                                                                                                                                | [57]      |
| S13977  | Tr61841, Tr61842                                                                                                                                                                                                                                                                                                                                              | [58]      |
| S14314  | Tr64104, Tr75521, Tr75522                                                                                                                                                                                                                                                                                                                                     | [59]      |
| S14704  | Tr68066                                                                                                                                                                                                                                                                                                                                                       | [16]      |
| S1604   | Tr705                                                                                                                                                                                                                                                                                                                                                         | [60]      |
| S16982  | Tr86687, Tr86688                                                                                                                                                                                                                                                                                                                                              | [4]       |
| S17154  | Tr85822, Tr85823, Tr85824, Tr85825, Tr85826, Tr85827, Tr85828, Tr85829, Tr85830                                                                                                                                                                                                                                                                               | [61]      |
| S1831   | Tr4866, Tr4867                                                                                                                                                                                                                                                                                                                                                | [62]      |
| S2024   | Tr362                                                                                                                                                                                                                                                                                                                                                         | [37]      |
| S2241   | Tr5876, Tr5877                                                                                                                                                                                                                                                                                                                                                | [63]      |
| S344    | Tr1530, Tr1531                                                                                                                                                                                                                                                                                                                                                | [24]      |
| S648    | Tr3605, Tr3606, Tr3607, Tr3608                                                                                                                                                                                                                                                                                                                                | [64]      |
| S837    | Tr5648, Tr5649, Tr5650, Tr5651                                                                                                                                                                                                                                                                                                                                | [65]      |
| S9937   | Tr6055, Tr6214                                                                                                                                                                                                                                                                                                                                                | [66]      |
| S9982   | Tr6290, Tr6369                                                                                                                                                                                                                                                                                                                                                | [67]      |

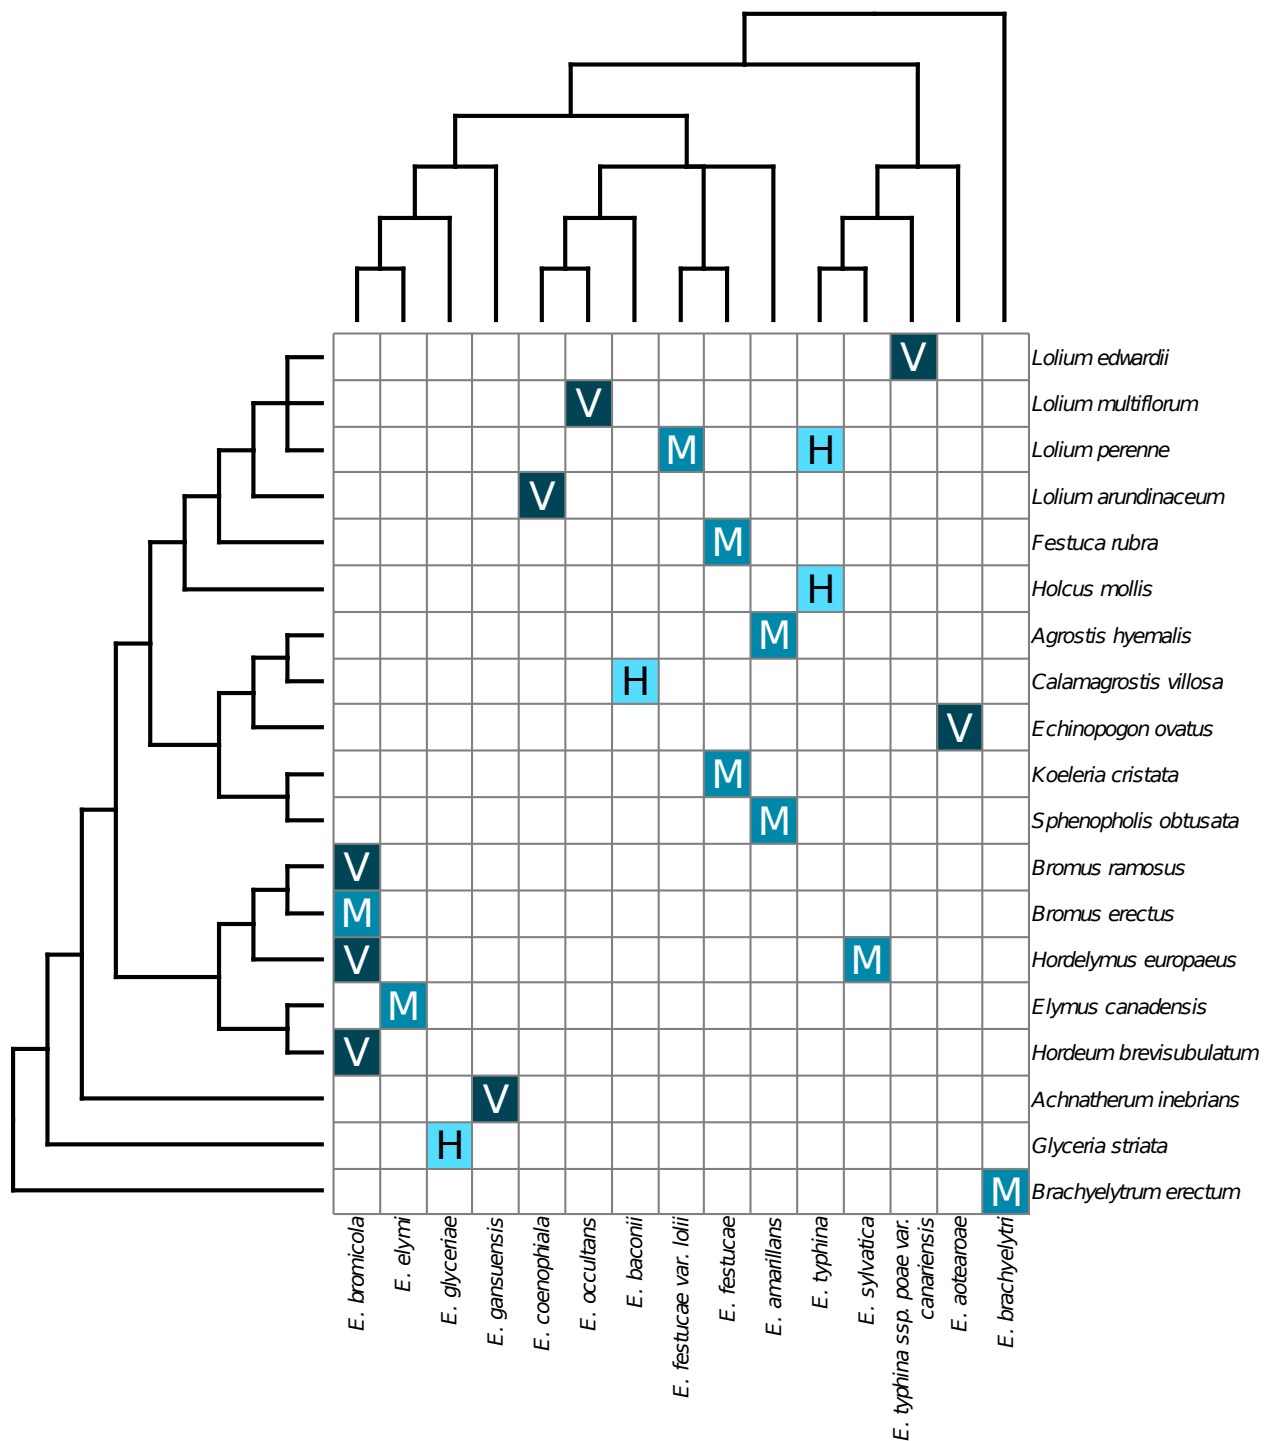

Figure 1: Phylogenetic and transmission mode data for single tree analysis. Rows represent host species, columns symbiont species. Colored squares represent the transmission mode exhibited by host-symbiont pairs. H refers to horizontal transmission, M to mixed-mode, and V to vertical. Blank squares indicate the pair does not form a symbiosis. Host and symbiont phylogenies are shown on the left and top, respectively.

Table 4: Covariances induced by each phylogenetic effect.  $H$  and  $S$  are the host and symbiont phylogenetic covariance matrices, respectively.  $I_k$  is the  $k \times k$  identity matrix.  $1_k$  is a  $k \times k$  matrix of ones.

| Phylogenetic Effect           | Covariance Induced |
|-------------------------------|--------------------|
| Host Effect                   | $H \otimes 1_m$    |
| Symbiont Effect               | $1_n \otimes S$    |
| Coevolutionary Effect         | $H \otimes S$      |
| Symbiont-Specific Host Effect | $H \otimes I_m$    |
| Host-Specific Symbiont Effect | $I_n \otimes S$    |

We can estimate the phylogenetic effect strengths most likely to have produced the observed transmission data if we make some assumptions about the distribution of  $Y$ . Specifically, we assume that  $Y$  has the matrix normal distribution given below, where  $\sigma_i^2$  are the phylogenetic effect strengths to be estimated and  $V_i$  are the covariance structures induced by phylogenetic effects (see Table 4).

$$Y \sim \mathcal{MN}_{nm,3} \left( \begin{bmatrix} \mu_{HT} & \mu_{MMT} & \mu_{VT} \\ \vdots & \vdots & \vdots \\ \mu_{HT} & \mu_{MMT} & \mu_{VT} \end{bmatrix}, \sum_{\text{phylo. effects}} \sigma_i^2 V_i, \frac{1}{4} \begin{bmatrix} 2 & 1 & 1 \\ 1 & 2 & 1 \\ 1 & 1 & 2 \end{bmatrix} \right)$$

## 1.4 Phylogenetic Effects Estimation

We estimated phylogenetic effects using the R package MCMCglmm [71]. We ran two MCMC chains for  $10^6$  iterations each, with overdispersed starting values of (1)  $10^{-10}$  for the phylogenetic effects and  $-8$  for the latent variables for one chain and (2)  $5$  for the phylogenetic effects and  $-8$  for the latent variables for the other. We used a thinning interval of 500 iterations and no burn-in. The priors for the phylogenetic effect strengths were F distributions of  $\frac{\sigma_i^2}{1000}$  with  $\text{df1} = 1$ ,  $\text{df2} = 0.002$ . We used the default prior for the mean, which was a multivariate normal distribution with mean 0 and variance  $1 \cdot 10^{10} \cdot I_3$ , where  $I_3$  is the  $3 \times 3$  identity matrix.

We used slightly different analysis parameters for the single tree transmission data set because it was smaller and harder to get the MCMC chains to converge. We ran the chains for  $10^7$  iterations to allow more time for convergence. We also used a burn-in of 2000 to allow MCMCglmm to adjust the proposal distribution for the first 2000 iterations in hopes of getting a better acceptance rate. Finally, we decreased the among-column covariance (the co-

variance between the log ratios of the transmission modes) from  $\frac{1}{4} \begin{bmatrix} 2 & 1 & 1 \\ 1 & 2 & 1 \\ 1 & 1 & 2 \end{bmatrix}$  to  $\frac{1}{40} \begin{bmatrix} 2 & 1 & 1 \\ 1 & 2 & 1 \\ 1 & 1 & 2 \end{bmatrix}$

to decrease the chance of the latent variables taking on extreme values and causing numerical problems [72]. (We adjusted for this change in the among-column covariance when comparing the single tree and supertree results, discussed below.) Despite this effort to avoid numerical problems, we had to stop the analysis after  $10^7$  iterations because the latent variables in one chain become too small. Fortunately, the chains appear to have converged before this point.

We rescaled our estimates of the means and calculated intraclass correlations for the phylogenetic effects, which together should have removed any difference due to differences in the among-column covariance. For all analyses, we rescaled our estimates of the means to reflect the case where the among-column covariance was 0 using the method of Diggle et al. 2002 as cited in [72]. We calculated intraclass correlations (ICCs) for the phylogenetic effects using the formula  $\frac{\hat{\sigma}_i^2}{\sum \hat{\sigma}_i^2 + \pi^2 + \text{tr}(\text{among-column covariance})}$ , where  $\hat{\sigma}_i^2$  is the estimate of phylogenetic effect  $i$ . We did this for each saved iteration of the MCMC chains to get a posterior distribution of the ICCs.

We used the posterior mode as a point estimate of the ICC. We calculated the posterior mode using MCMCglmm's posterior.mode function with the parameter adjust (the scaling for the bandwidth) set to 1. We obtained credible intervals for the ICCs using Coda's HPDinterval function to get 95% highest posterior density intervals.

We checked for chain convergence using the multivariate potential scale reduction factor (MPSRF) [73] and the effective sample size, both calculated with Coda.

To analyze our simulation results, we needed a simple way to determine whether we detected a phylogenetic effect or not. We considered an effect to have been detected if the posterior mode of its intraclass correlation was  $\geq 0.02$ , or 2% of the total variance.

## 1.5 Simulations

To determine whether the observed phylogenetic pattern can emerge from a combination of coevolutionary interactions and faster rates of evolution along the symbiont phylogeny relative to the host, we simulated transmission mode data for the case where hosts and symbionts coevolved control of transmission mode. We used the same host phylogeny used for the supertree analysis. We modified the symbiont supertree to simulate faster evolution in the symbiont. We did this by reducing the correlation between related symbionts by a factor of either 2 or 20 (but not the correlation of a symbiont with itself, which is always 1). We then simulated  $Y_{\text{sim}}$  as a matrix normal random variable with the variance structure given for  $Y$  above, with all phylogenetic effects equal to  $10^{-8}$  except the coevolutionary

effect, which we set to 4. We set the mean of  $Y_{\text{sim}}$  using

$$\begin{aligned}\mu_{HT} &= \log \left( \frac{\text{Frequency of horizontal transmission}}{\text{Frequency of no transmission}} \right) - 1 \\ \mu_{MMT} &= \log \left( \frac{\text{Frequency of mixed-mode transmission}}{\text{Frequency of no transmission}} \right) - 1 \\ \mu_{VT} &= \log \left( \frac{\text{Frequency of vertical transmission}}{\text{Frequency of no transmission}} \right) - 1\end{aligned}$$

The frequencies of each transmission mode were obtained from the transmission mode data set used for the supertree analysis.

We also simulated each phylogenetic alone to test the accuracy of the phylogenetic effect estimates. For these simulations, we set one phylogenetic effect at a time to 4, and the others to  $10^{-8}$ . For each phylogenetic effect, we simulation transmission data three times. In two simulations (simulations 1 and 2 in Table 7) we simulated the case where the transmission modes were about four times as prevalent as in the dataset used for the supertree data set. Thus for  $Y_{\text{sim}}$  we had

$$\begin{aligned}\mu_{HT} &= \log \left( \frac{4 \cdot \text{Frequency of horizontal transmission}}{1 - 4 \cdot \text{Frequency of pairs forming symbioses}} \right) - 1 \\ \mu_{MMT} &= \log \left( \frac{4 \cdot \text{Frequency of mixed-mode transmission}}{1 - 4 \cdot \text{Frequency of pairs forming symbioses}} \right) - 1 \\ \mu_{VT} &= \log \left( \frac{4 \cdot \text{Frequency of vertical transmission}}{1 - 4 \cdot \text{Frequency of pairs forming symbioses}} \right) - 1\end{aligned}$$

where the frequencies of transmission modes and symbioses are those in the data set used for the supertree analysis.

In the third case (simulation 3 in Table 7), we simulated the case where the transmission modes were as prevalent as in the supertree data set. In this case,  $Y_{\text{sim}}$  was the same as for the fast symbiont evolution simulations above.

We also simulated missing data for the simulations where the phylogenetic effects were four times as prevalent as in our supertree data set. We did this by randomly labeling 75% of host-symbiont pairs as not forming a symbiosis, whether or not they really did form a symbiosis. This meant that the simulated missing data sets had approximately the same fraction of symbioses recorded as our actual data set.

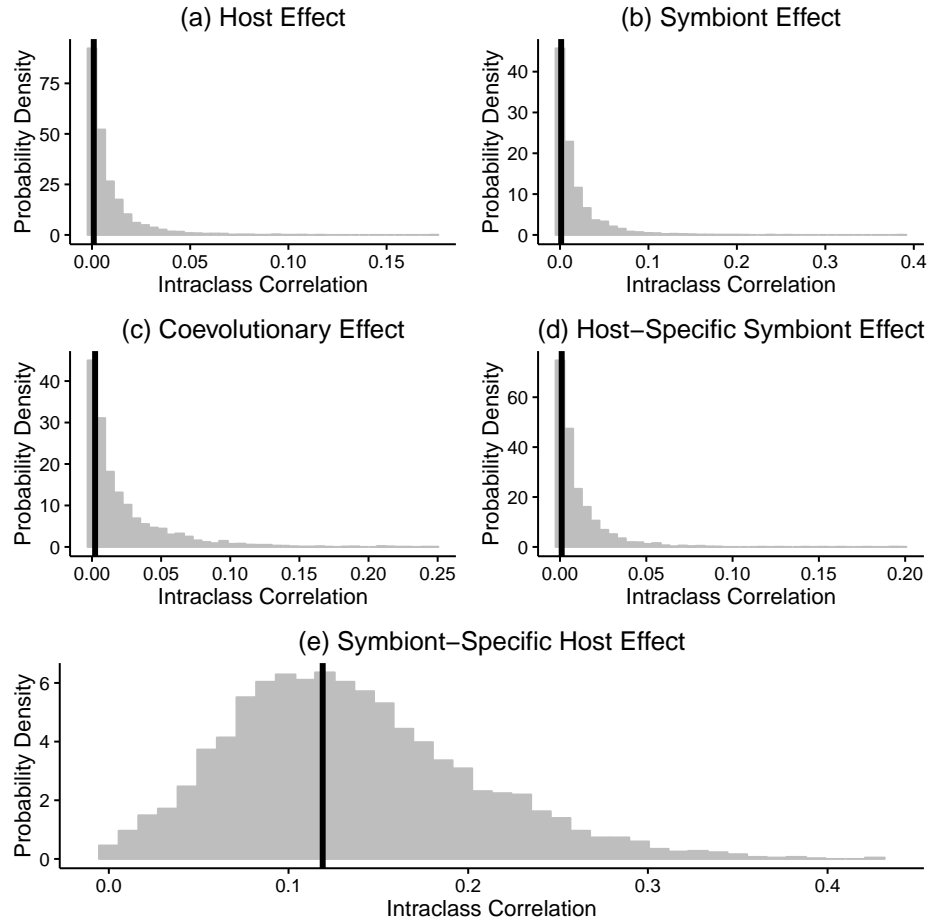

Figure 2: Posterior distribution of the estimates of the intraclass correlations for the supertree analysis.

## 2 Results for Analysis of Real Data

### 2.1 Supertree Analysis Results

The posterior distribution of the intraclass correlations of the phylogenetic effects is given in Figure 2. The symbiont-specific host effect's distribution is centered around about 12% of the total variance. The host, symbiont, coevolutionary, and host-specific symbiont effects all have most of their mass near 0% of the variance explained.

### 2.2 Single Tree Analysis Results

Like the supertree, the symbiont-specific host effect had the only the posterior distribution with a large amount of mass on nonzero values (Figure 3). The posterior mode of the symbiont-specific host effect's intraclass correlation was 0.11, meaning it explained 11% of

| <b>Phylogenetic Effect</b>    | <b>Intraclass Correlation</b> | <b>95% Credible Interval</b> |
|-------------------------------|-------------------------------|------------------------------|
| Host Effect                   | 0.001                         | (0.00, 0.07)                 |
| Symbiont Effect               | 0.002                         | (0.00, 0.12)                 |
| Coevolutionary Interaction    | 0.004                         | (0.00, 0.27)                 |
| Symbiont-Specific Host Effect | 0.11                          | (0.04, 0.82)                 |
| Host-Specific Symbiont Effect | 0.002                         | (0.00, 0.08)                 |

Table 5: Estimated phylogenetic effects for analysis using single phylogenetic trees. Intraclass correlation given is the posterior mode.

the total variance, with a 95% credible interval of 0% of the total variance to 82% (Table 5). The other phylogenetic effects had posterior modes of  $\leq 0.4\%$  of the total variance.

All the phylogenetic effects had larger credible intervals than their counterparts in the supertree data set. Further, the lower bounds of the credible intervals of the phylogenetic effects were all very close to 0% of the total variance. This may be due to the difficulty of inferring phylogenetic effects on a small transmission data set.

Because of numerical problems with the MCMC chains used to estimate the phylogenetic effects for the single tree data set, we had to stop the analysis after 10 million iterations. Although the chains appeared to converge when we examined the trace plots, the multivariate potential scale reduction factor was 1.30, and the effective sample sizes of the means of log ratios of the transmission modes were in the range of 67 to 83. The symbiont-specific host effect had an effective sample size of 139. The other phylogenetic effects had effective sample sizes  $> 1000$ .

## 3 Simulation Results

### 3.1 Fast Symbiont Evolution

Three of our four simulations of coevolution combined with fast symbiont evolution appeared to have a symbiont-specific host effect (Table 6). The posterior modes of the ICC of the symbiont specific host effect ranged from 3.8% of the total variance to 11% in these three simulations. In the fourth simulation the symbiont-specific host effect explained only 0.6% of the variance. In this simulation, the host effect had the largest ICC, explaining 3.4% of the variance. The only other phylogenetic effect detected in any simulation was a coevolutionary effect which explained 3% of the variance in one of the simulations where a symbiont-specific host effect was detected.

Based on our simulation results, it looks like it is possible for a coevolutionary effect

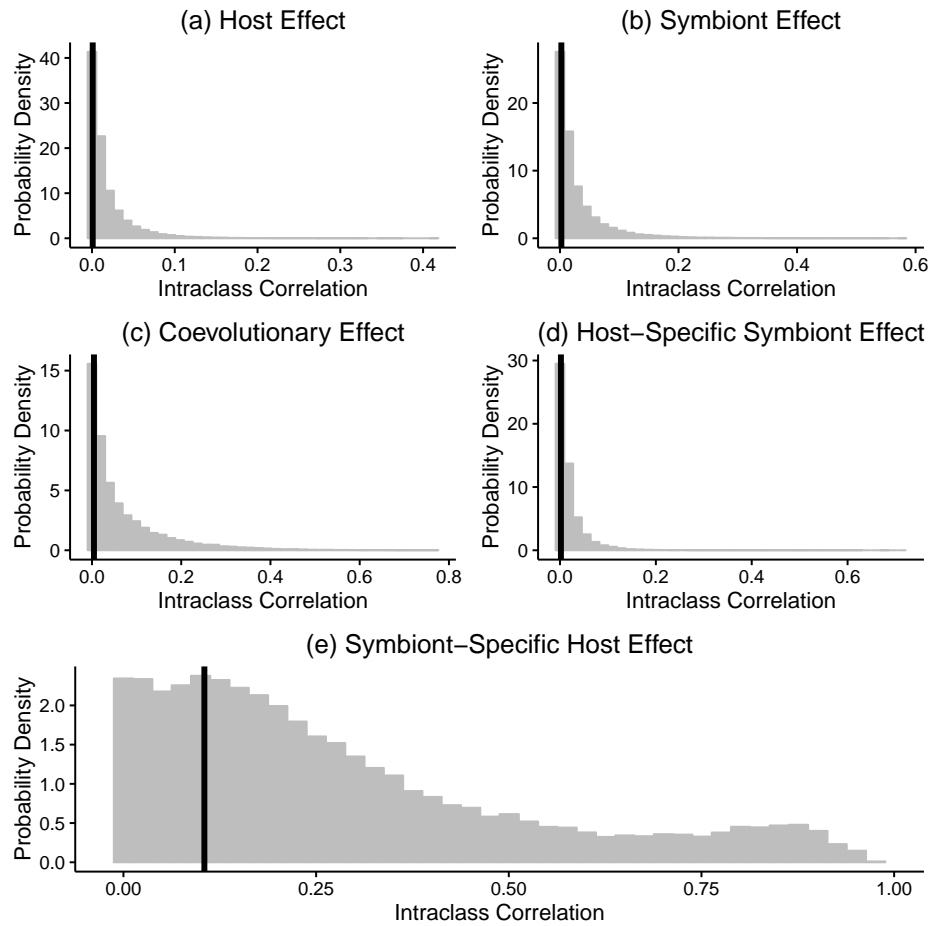

Figure 3: Posterior distributions of phylogenetic effects for single tree analysis.



to be mistaken for a symbiont-specific host effect when the symbiont is evolving quickly. However, we did have some difficulty in detecting a coevolutionary effect in simulations where the symbiont was evolving at the same speed as the host. It is possible that regardless of the speed of symbiont evolution, the coevolutionary effect is generally easy to mistake for a symbiont-specific host effect (which we detected in all three simulations of normal-speed coevolution below).

Table 6: Phylogenetic effect estimates for simulated fast symbiont evolution. ICC = posterior mode of intraclass correlation.

| Symbiont<br>Evo. Rate<br>Relative<br>to Host | Simulation | Phylogenetic Effect |                     |                 |              |                          |                     |                                  |                     |                                  |              |
|----------------------------------------------|------------|---------------------|---------------------|-----------------|--------------|--------------------------|---------------------|----------------------------------|---------------------|----------------------------------|--------------|
|                                              |            | Host Effect         |                     | Symbiont Effect |              | Coevolutionary<br>Effect |                     | Symbiont-specific<br>Host Effect |                     | Host-specific<br>Symbiont Effect |              |
|                                              |            | ICC                 | 95% CI              | ICC             | 95% CI       | ICC                      | 95% CI              | ICC                              | 95% CI              | ICC                              | 95% CI       |
| 2x                                           | 1          | <b>0.034</b>        | <b>(0.00, 0.16)</b> | 0.001           | (0.00, 0.08) | 0.001                    | (0.00, 0.03)        | 0.006                            | (0.00, 0.09)        | 0.002                            | (0.00, 0.05) |
| 2x                                           | 2          | 0.001               | (0.00, 0.03)        | 0.008           | (0.00, 0.13) | 0.001                    | (0.00, 0.04)        | <b>0.055</b>                     | <b>(0.00, 0.14)</b> | 0.007                            | (0.00, 0.11) |
| 20x                                          | 1          | 0.002               | (0.00, 0.06)        | 0.007           | (0.00, 0.17) | <b>0.030</b>             | <b>(0.00, 0.12)</b> | <b>0.11</b>                      | <b>(0.03, 0.22)</b> | 0.002                            | (0.00, 0.05) |
| 20x                                          | 2          | 0.001               | (0.00, 0.04)        | 0.001           | (0.00, 0.05) | 0.001                    | (0.00, 0.04)        | <b>0.038</b>                     | <b>(0.00, 0.11)</b> | 0.004                            | (0.00, 0.08) |

## 3.2 Single Phylogenetic Effects

We didn't see much difference between the data sets simulated with four times the frequency of symbioses in the real data set and those simulated with the same same frequency as in the real data. We never detected a coevolutionary effect, but otherwise we were generally successful detecting the phylogenetic effects we simulated, detecting them in at least two out of three simulations. Unfortunately, we also detected phylogenetic effects that were not present in seven of our fifteen simulated data sets (see Table 7).

When we simulated the coevolutionary effect, we detected effects other than it in three out of three simulations. In two cases we detected a symbiont-specific host effect, once in conjunction with a host effect. We detected a host-specific symbiont effect in the third simulation. Besides the coevolutionary effect simulation, there didn't seem to be a pattern to which simulations produced false positives.

When we detected phylogenetic effects that weren't simulated, their posterior modes were  $\leq 3\%$  in five cases. One larger effect was the symbiont-specific host effect detected in one symbiont effect simulation, which had a posterior mode of 5.8%. And in one simulation of the coevolutionary effect, a host effect was detected with posterior mode of 8.2%, and the symbiont-specific host effect had a posterior mode of 4.6%.

In all cases, the MCMC chains appeared to converge. The MPSRF was  $\leq 1.04$  in all analyses, and the effective sample size was  $\geq 200$ .

Our simulation results suggest that we don't have much difficulty detecting phylogenetic effects other than the coevolutionary effect, which appears to be strangely difficult to detect. However, our data set is too small for us to be certain that we will only detect phylogenetic effects that are really present in the data.

## 3.3 Missing Data

When we simulated missing data, we never detected effects that weren't detected in the original simulated data set (see Table 8). We failed to detect at least one effect that was detected in the original simulated data set in seven out of nine cases where at least one phylogenetic effect was detected in the original data sets. In six cases where a phylogenetic effect was detected originally, we detected no phylogenetic effects at all.

The multivariate potential scale reduction factor was  $\leq 1.1$  for all but one analysis, which had a MPSRF of 1.11. The effective sample size was  $> 100$  in all analyses, and generally much larger.

Our results suggest that missing data in our real data set may cause us to fail to detect phylogenetic effects that are really present. It is possible but less likely that any missing

data caused us to detect phylogenetic effects that are not really present.

Table 7: Estimated phylogenetic effects for simulated data. Colored boxes indicated phylogenetic effects that were detected (posterior mode of intraclass correlation was  $> 0.04$ ). Blue boxes and bold text indicate that the effect detected was the one simulated. Red boxes and italic text indicate that the effect detected was not simulated. Simulations 1 and 2 for each phylogenetic effect had the likelihood of each transmission mode set to four times its frequency in the true supertree data set. Simulation 3 had the likelihood of each transmission mode the same as in the true data set.

| Simulated Phylogenetic Effect | Simulation | Phylogenetic Effect |                     |                 |                     |                       |              |                               |                      |                               |                     |
|-------------------------------|------------|---------------------|---------------------|-----------------|---------------------|-----------------------|--------------|-------------------------------|----------------------|-------------------------------|---------------------|
|                               |            | Host Effect         |                     | Symbiont Effect |                     | Coevolutionary Effect |              | Symbiont-specific Host Effect |                      | Host-specific Symbiont Effect |                     |
|                               |            | ICC                 | 95% CI              | ICC             | 95% CI              | ICC                   | 95% CI       | ICC                           | 95% CI               | ICC                           | 95% CI              |
| Host Effect                   | 1          | <b>0.12</b>         | <b>(0.04, 0.31)</b> | 0.001           | (0.00, 0.04)        | 0.001                 | (0.00, 0.03) | 0.001                         | (0.00, 0.03)         | 0.001                         | (0.00, 0.07)        |
|                               | 2          | <b>0.38</b>         | <b>(0.11, 0.81)</b> | 0.001           | (0.00, 0.03)        | <b>0.001</b>          | (0.00, 0.02) | 0.001                         | (0.00, 0.02)         | <i>0.029</i>                  | <i>(0.00, 0.23)</i> |
|                               | 3          | <b>0.47</b>         | <b>(0.06, 0.66)</b> | <0.001          | (0.00, 0.01)        | <0.001                | (0.00, 0.01) | <0.001                        | (0.00, 0.01)         | 0.004                         | (0.00, 0.09)        |
| Symbiont Effect               | 1          | 0.002               | (0.00, 0.03)        | <b>0.15</b>     | <b>(0.00, 0.36)</b> | 0.001                 | (0.00, 0.03) | 0.006                         | (0.00, 0.08)         | 0.001                         | (0.00, 0.02)        |
|                               | 2          | 0.001               | (0.00, 0.02)        | 0.013           | (0.00, 0.22)        | 0.001                 | (0.00, 0.02) | <i>0.058</i>                  | <i>(0.01, 0.12)</i>  | <0.001                        | (0.00, 0.01)        |
|                               | 3          | 0.001               | (0.00, 0.04)        | <b>0.027</b>    | <b>(0.00, 0.21)</b> | 0.004                 | (0.00, 0.08) | 0.002                         | (0.00, 0.05)         | <i>0.027</i>                  | <i>(0.00, 0.09)</i> |
| Coevolutionary Effect         | 1          | 0.002               | (0.00, 0.05)        | 0.001           | (0.00, 0.07)        | 0.002                 | (0.00, 0.04) | <i>0.030</i>                  | <i>(0.00, 0.07)</i>  | 0.014                         | (0.00, 0.06)        |
|                               | 2          | <i>0.082</i>        | <i>(0.00, 0.27)</i> | 0.007           | (0.00, 0.10)        | 0.003                 | (0.00, 0.07) | <i>0.046</i>                  | <i>(0.00, 0.10)</i>  | 0.014                         | (0.00, 0.08)        |
|                               | 3          | 0.004               | (0.00, 0.14)        | 0.003           | (0.00, 0.09)        | 0.003                 | (0.00, 0.09) | 0.007                         | (0.00, 0.10)         | <i>0.030</i>                  | <i>(0.00, 0.13)</i> |
| Symbiont-specific Host Effect | 1          | <0.001              | (0.00, 0.01)        | 0.004           | (0.00, 0.11)        | <0.001                | (0.00, 0.01) | 0.002                         | (0.00, 0.04)         | 0.001                         | (0.00, 0.02)        |
|                               | 2          | 0.001               | (0.00, 0.04)        | 0.004           | (0.00, 0.12)        | 0.001                 | (0.00, 0.02) | <b>0.086</b>                  | <b>(0.04, 0.17)</b>  | 0.014                         | (0.00, 0.06)        |
|                               | 3          | 0.001               | (0.00, 0.03)        | <i>0.025</i>    | <i>(0.00, 0.22)</i> | 0.002                 | (0.00, 0.05) | <b>0.053</b>                  | <b>(0.00, 0.015)</b> | 0.001                         | (0.00, 0.04)        |
| Host-specific Symbiont Effect | 1          | 0.003               | (0.00, 0.05)        | 0.001           | (0.00, 0.03)        | 0.001                 | (0.00, 0.02) | <0.001                        | (0.00, 0.01)         | <b>0.023</b>                  | <b>(0.00, 0.05)</b> |
|                               | 2          | 0.001               | (0.00, 0.05)        | <0.001          | (0.00, 0.02)        | 0.001                 | (0.00, 0.02) | 0.001                         | (0.00, 0.03)         | <b>0.027</b>                  | <b>(0.00, 0.07)</b> |
|                               | 3          | 0.001               | (0.00, 0.04)        | 0.001           | (0.00, 0.03)        | 0.001                 | (0.00, 0.05) | 0.001                         | (0.00, 0.04)         | <b>0.072</b>                  | <b>(0.01, 0.16)</b> |

Table 8: Estimated phylogenetic effects for simulated missing data. Blue boxes and bold text indicate that an effect detected in the original simulated data was detected (posterior mode of ICC > 0.04). Grey boxes and normal text indicate that an effect detected in the original simulated data set was not detected.

| Simulated Phylogenetic Effect | Simulation | Phylogenetic Effect |                      |                 |                     |                       |              |                               |              |                               |                     |
|-------------------------------|------------|---------------------|----------------------|-----------------|---------------------|-----------------------|--------------|-------------------------------|--------------|-------------------------------|---------------------|
|                               |            | Host Effect         |                      | Symbiont Effect |                     | Coevolutionary Effect |              | Symbiont-specific Host Effect |              | Host-specific Symbiont Effect |                     |
|                               |            | ICC                 | 95% CI               | ICC             | 95% CI              | ICC                   | 95% CI       | ICC                           | 95% CI       | ICC                           | 95% CI              |
| Host Effect                   | 1          | <b>0.097</b>        | <b>(0.00, 0.035)</b> | 0.002           | (0.00, 0.06)        | 0.002                 | (0.00, 0.07) | 0.002                         | (0.00, 0.08) | 0.006                         | (0.00, 0.13)        |
|                               | 2          | 0.006               | (0.00, 0.21)         | 0.002           | (0.00, 0.08)        | 0.002                 | (0.00, 0.07) | 0.015                         | (0.00, 0.28) | <b>0.029</b>                  | <b>(0.00, 0.27)</b> |
| Symbiont Effect               | 1          | 0.003               | (0.00, 0.08)         | <b>0.029</b>    | <b>(0.00, 0.29)</b> | 0.002                 | (0.00, 0.08) | 0.004                         | (0.00, 0.10) | 0.011                         | (0.00, 0.14)        |
|                               | 2          | 0.001               | (0.00, 0.03)         | 0.002           | (0.00, 0.07)        | 0.001                 | (0.00, 0.03) | 0.004                         | (0.00, 0.08) | 0.001                         | (0.00, 0.03)        |
| Coevolutionary Effect         | 1          | 0.001               | (0.00, 0.05)         | 0.003           | (0.00, 0.08)        | 0.001                 | (0.00, 0.05) | 0.002                         | (0.00, 0.06) | 0.003                         | (0.00, 0.08)        |
|                               | 2          | 0.002               | (0.00, 0.10)         | 0.005           | (0.00, 0.13)        | 0.002                 | (0.00, 0.07) | 0.004                         | (0.00, 0.10) | 0.004                         | (0.00, 0.11)        |
| Symbiont-specific Host Effect | 1          | 0.001               | (0.00, 0.04)         | 0.003           | (0.00, 0.10)        | 0.001                 | (0.00, 0.04) | 0.003                         | (0.00, 0.07) | 0.002                         | (0.00, 0.07)        |
|                               | 2          | 0.001               | (0.00, 0.04)         | 0.001           | (0.00, 0.07)        | 0.001                 | (0.00, 0.04) | 0.008                         | (0.00, 0.17) | 0.008                         | (0.00, 0.17)        |
| Host-specific Symbiont Effect | 1          | 0.002               | (0.00, 0.05)         | 0.002           | (0.00, 0.07)        | 0.002                 | (0.00, 0.04) | 0.001                         | (0.00, 0.04) | 0.007                         | (0.00, 0.11)        |
|                               | 2          | 0.001               | (0.00, 0.06)         | 0.002           | (0.00, 0.05)        | 0.001                 | (0.00, 0.03) | 0.001                         | (0.00, 0.03) | 0.003                         | (0.00, 0.07)        |

## References

- [1] Afkhami, ME, Rudgers, JA. Symbiosis Lost: Imperfect Vertical Transmission of Fungal Endophytes in Grasses. *The American Naturalist* **172** (2008), 405–416. (doi:10.1086/589893).
- [2] Brem, D, Leuchtman, A. Intraspecific competition of endophyte infected vs uninfected plants of two woodland grass species. *Oikos* **96** (2002), 281–290. (doi:10.1034/j.1600-0706.2002.960210.x).
- [3] Card, SD, Rolston, MP, Lloyd-West, C, Hume, DE. Novel perennial ryegrass-Neotyphodium endophyte associations: relationships between seed weight, seedling vigour and endophyte presence. *Symbiosis* **62** (2014), 51–62. (doi:10.1007/s13199-014-0271-5).
- [4] Chen, L, Li, X, Li, C, Swoboda, GA, Young, CA, Sugawara, K, Leuchtman, A, Schardl, CL. Two distinct *Epichloe* species symbiotic with *Achnatherum inebrians*, drunken horse grass. *Mycologia* **107** (2015), 863–873. (doi:10.3852/15-019).
- [5] Chung, KR, Schardl, C. Sexual cycle and horizontal transmission of the grass symbiont, *Epichloë typhina*. *Mycological Research* **101** (1997), 295–301. (doi:10.1017/S0953756296002602).
- [6] Craven, KD, Hsiau, PTW, Leuchtman, A, Hollin, W, Schardl, CL. Multigene Phylogeny of *Epichloe* Species, Fungal Symbionts of Grasses. *Annals of the Missouri Botanical Garden* **88** (2001), 14. (doi:10.2307/2666129).
- [7] Davitt, AJ, Chen, C, Rudgers, JA. Understanding context-dependency in plant-microbe symbiosis: The influence of abiotic and biotic contexts on host fitness and the rate of symbiont transmission. *Environmental and Experimental Botany* **71** (2011), 137–145. (doi:10.1016/j.envexpbot.2010.11.004).
- [8] Gibert, A, Hazard, L. Genetically based vertical transmission drives the frequency of the symbiosis between grasses and systemic fungal endophytes. *Journal of Ecology* **101** (2013). Ed. by Thrall, P, 743–752. (doi:10.1111/1365-2745.12073).
- [9] Groppe, K, Steinger, T, Schmid, B, Baur, B, Boller, T. Effects of habitat fragmentation on choke disease (*Epichloe bromicola*) in the grass *Bromus erectus*. *Journal of Ecology* **89** (2001), 247–255. (doi:10.1046/j.1365-2745.2001.00538.x).

- [10] Gundel, P, Garibaldi, L, Martínez-Ghersa, M, Ghersa, C. Neotyphodium endophyte transmission to *Lolium multiflorum* seeds depends on the host plant fitness. *Environmental and Experimental Botany* (2011). (doi:10.1016/j.envexpbot.2011.02.002).
- [11] Gundel, PE, Rudgers, JA, Ghersa, CM. Incorporating the process of vertical transmission into understanding of host-symbiont dynamics. *Oikos* **120** (2011), 1121–1128. (doi:10.1111/j.1600-0706.2011.19299.x).
- [12] Gundel, PE, Garibaldi, LA, Tognetti, PM, Aragón, R, Ghersa, CM, Omacini, M. Imperfect Vertical Transmission of the Endophyte *Neotyphodium* in Exotic Grasses in Grasslands of the Flooding Pampa. *Microbial Ecology* **57** (2009), 740–748. (doi:10.1007/s00248-008-9447-y).
- [13] Gundel, PE, Martínez-Ghersa, MA, Garibaldi, LA, Ghersa, CM. Viability of *Neotyphodium* endophytic fungus and endophyte-infected and noninfected *Lolium multiflorum* seeds. *Botany* **87** (2009), 88–96. (doi:10.1139/B08-119).
- [14] Gundel, PE, Martínez-Ghersa, MA, Omacini, M, Cuyeu, R, Pagano, E, Ríos, R, Ghersa, CM. Mutualism effectiveness and vertical transmission of symbiotic fungal endophytes in response to host genetic background: Grass-fungus mutualism and host genetic background. *Evolutionary Applications* **5** (2012), 838–849. (doi:10.1111/j.1752-4571.2012.00261.x).
- [15] Ju, HJ. Direct Evidence of Endophyte (*Neotyphodium coenophialum*) Genotype Effect on Growth and Vertical Transmission of Endophyte in Tall Fescue (*Schedonorus phoenix* Scop.) Under Water Stress. *The Plant Pathology Journal* **27** (2011), 249–256. (doi:10.5423/PPJ.2011.27.3.249).
- [16] Leuchtman, A, Bacon, CW, Schardl, CL, White, JF, Tadych, M. Nomenclatural realignment of *Neotyphodium* species with genus *Epichloe*. *Mycologia* **106** (2014), 202–215. (doi:10.3852/13-251).
- [17] Leyronas, C, Raynal, G. Role of Fungal Ascospores in the Infection of Orchardgrass (*Dactylis glomerata*) by *Epichloë typhina* Agent of Choke Disease. *Journal of Plant Pathology* **90** (2008), 15–21.
- [18] Li, X, Zhou, Y, Zhu, M, Qin, J, Ren, A, Gao, Y. Stroma-bearing endophyte and its potential horizontal transmission ability in *Achnatherum sibiricum*. *Mycologia* **107** (2015), 21–31. (doi:10.3852/13-355).



- [19] Meijer, G, Leuchtman, A. Fungal genotype controls mutualism and sex in brachyposium sylvaticum infected by epichloë sylvatica. *Acta Biologica Hungarica* **52** (2001), 249–263. (doi:10.1556/ABiol.52.2001.2-3.9).
- [20] Meijer, G, Leuchtman, A. Multistrain infections of the grass Brachypodium sylvaticum by its fungal endophyte Epichloe sylvatica. *New Phytologist* **141** (1999), 355–368. (doi:10.1046/j.1469-8137.1999.00332.x).
- [21] Noh, J, Ju, HJ. Effect of Tall fescue (*Schedonorus phoenix* Scop.) Genotype on Endophyte (*Neotyphodium coenophialum*) Transmission under Water stress. *Journal of The Korean Society of Grassland and Forage Science* **32** (2012), 325–334. (doi:10.5333/KGFS.2012.32.4.325).
- [22] Oberhofer, M, Leuchtman, A. Horizontal transmission, persistence and competition capabilities of Epichloë endophytes in *Hordelymus europaeus* grass hosts using dual endophyte inocula. *Fungal Ecology* **11** (2014), 37–49. (doi:10.1016/j.funeco.2014.04.005).
- [23] Rudgers, JA, Afkhami, ME, Rúa, MA, Davitt, AJ, Hammer, S, Huguet, VM. A fungus among us: broad patterns of endophyte distribution in the grasses. *Ecology* **90** (2009), 1531–1539. (doi:10.1890/08-0116.1).
- [24] Schardl, CL, Leuchtman, A. Three New Species of Epichloe Symbiotic with North American Grasses. *Mycologia* **91** (1999), 95. (doi:10.2307/3761196).
- [25] Schardl, CL, Young, CA, Faulkner, JR, Florea, S, Pan, J. Chemotypic diversity of epichloae, fungal symbionts of grasses. *Fungal Ecology* **5** (2012), 331–344. (doi:10.1016/j.funeco.2011.04.005).
- [26] Schardl, CL. EPICHLÖE SPECIES: Fungal Symbionts of Grasses. *Annual Review of Phytopathology* **34** (1996), 109–130. (doi:10.1146/annurev.phyto.34.1.109).
- [27] Schardl, CL. Epichloë festucae and Related Mutualistic Symbionts of Grasses. *Fungal Genetics and Biology* **33** (2001), 69–82. (doi:10.1006/fgbi.2001.1275).
- [28] Schardl, CL. The Epichloae, Symbionts of the Grass Subfamily Poöideae. *Ann. Missouri Bot. Gard.* **97** (2010), 646–665. (doi:10.3417/2009144).
- [29] Song, H, Nan, Z. Origin, Divergence, and Phylogeny of Asexual Epichloë Endophyte in *Elymus* Species from Western China. *PLOS ONE* **10** (2015). Ed. by Sun, G, e0127096. (doi:10.1371/journal.pone.0127096).
- [30] Tadych, M, Bergen, MS, White, JF. Epichloe spp. associated with grasses: new insights on life cycles, dissemination and evolution. *Mycologia* **106** (2014), 181–201. (doi:10.3852/106.2.181).

- [31] Tintjer, T, Leuchtman, A, Clay, K. Variation in horizontal and vertical transmission of the endophyte *Epichloë elymi* infecting the grass *Elymus hystrix*. *New Phytol.* **179** (2008), 236–246. (doi:10.1111/j.1469-8137.2008.02441.x).
- [32] Wiewióra, B, Żurek, G, Pańka, D. Is the Vertical Transmission of *Neotyphodium lolii* in Perennial Ryegrass the Only Possible Way to the Spread of Endophytes? *PLOS ONE* **10** (2015), e0117231. (doi:10.1371/journal.pone.0117231).
- [33] Tadych, M, Ambrose, KV, Bergen, MS, Belanger, FC, White, JF. Taxonomic placement of *Epichloë poae* sp. nov. and horizontal dissemination to seedlings via conidia. *Fungal Diversity* **54** (2012), 117–131. (doi:10.1007/s13225-012-0170-0).
- [34] Paradis, E, Claude, J, Strimmer, K. APE: Analyses of Phylogenetics and Evolution in R language. *Bioinformatics* **20** (2004), 289–290. (doi:10.1093/bioinformatics/btg412).
- [35] Huson, DH, Scornavacca, C. Dendroscope 3: An Interactive Tool for Rooted Phylogenetic Trees and Networks. *Syst. Biol.* **61** (2012), 1061–1067. (doi:10.1093/sysbio/sys062).
- [36] Creevey, CJ, McInerney, JO. Clann: investigating phylogenetic information through supertree analyses. *Bioinformatics* **21** (2005), 390–392. (doi:10.1093/bioinformatics/bti020).
- [37] Schardl, CL, Craven, KD, Speakman, S, Stromberg, A, Lindstrom, A, Yoshida, R. A Novel Test for Host-Symbiont Codivergence Indicates Ancient Origin of Fungal Endophytes in Grasses. *Syst. Biol.* **57** (2008), 483–498. (doi:10.1080/10635150802172184).
- [38] Cialdella, AM, Salariato, DL, Aagesen, L, Giussani, LM, Zuloaga, FO, Morrone, O. Phylogeny of New World Stipeae (Poaceae): an evaluation of the monophyly of Aciachne and Amelichloa. *Cladistics* **26** (2010), 563–578. (doi:10.1111/j.1096-0031.2010.00310.x).
- [39] Helfgott, DM, Mason-Gamer, RJ. The Evolution of North American *Elymus* (Triticeae, Poaceae) Allotetraploids: Evidence from Phosphoenolpyruvate Carboxylase Gene Sequences. *Systematic Botany* (2004).
- [40] Gillespie, LJ, Soreng, RJ. A Phylogenetic Analysis of the Bluegrass Genus *Poa* Based on cpDNA Restriction Site Data. *Systematic Botany* **30** (2005), 84–105.
- [41] Soreng, RJ. Chloroplast-DNA phylogenetics and biogeography in a reticulating group: Study in *Poa* (Poaceae). *American Journal of Botany* **77** (1990), 1383–1400.

- [42] Sclovich, SE, Giussani, LM, Cialdella, AM, Sede, S. Phylogenetic analysis of *Jarava* (Poaceae, Pooideae, Stipeae) and related genera: testing the value of the awn indumentum in the circumscription of *Jarava*. *Plant Systematics and Evolution* (2014).
- [43] Pillay, M, Hilu, KW. Chloroplast-DNA restriction site analysis in the genus *Bromus* (Poaceae). *American Journal of Botany* **82** (1995), 239–249.
- [44] Soreng, RJ, Davis, JI, Doyle, JJ. A phylogenetic analysis of chloroplast DNA restriction site variation in Poaceae subfam. Pooideae. *Plant Systematics and Evolution* **172** (1990), 83–97.
- [45] Darbyshire, SJ, Warwick, SI. Phylogeny of North American *Festuca* (Poaceae) and related genera using chloroplast DNA restriction site variation. *Canadian Journal of Botany* **70** (1992), 2415–2429.
- [46] Torrecilla, P, Catalan, P. Phylogeny of broad-leaved and fine-leaved *Festuca* lineages (Poaceae) based on nuclear ITS sequences. *Systematic Botany* **27** (2002), 241–251. (doi:10.1043/0363-6445-26.2.299).
- [47] Yan, K, Yanling, J, Xianghui, S, Lihui, Z, Wei, L, Hanshou, Y, Zhiwei, W. Taxonomy of *Neotyphodium* endophytes of Chinese native *Roegneria* plants. *Mycologia* **101** (2009), 211–219. (doi:10.3852/08-018).
- [48] Ghimire, SR, Rudgers, JA, Charlton, ND, Young, C, Craven, KD. Prevalence of an intraspecific *Neotyphodium* hybrid in natural populations of stout wood reed (*Cinna arundinacea* L.) from eastern North America. *Mycologia* **103** (2011), 75–84. (doi:10.3852/10-154).
- [49] Ji, YL. Propose of a New Variety of *Epichloë sylvatica* in Native *Brachypodium sylvaticum* (Huds.) P. Beauv. Grown in Huangshan. *Mycology: An International Journal on Fungal Biology* (2012).
- [50] Oberhofer, M, Leuchtman, A. Genetic diversity in epichloid endophytes of *Hordelymus europaeus* suggests repeated host jumps and interspecific hybridizations: ENDOPHYTES OF *HORDELYMUS EUROPAEUS*. *Molecular Ecology* **21** (2012), 2713–2726. (doi:10.1111/j.1365-294X.2012.05459.x).
- [51] Yokoyama, E, Yamagishi, K, Hara, A. Development of a PCR-based mating-type assay for Clavicipitaceae. *FEMS Microbiology Letters* **237** (2004), 205–212. (doi:10.1111/j.1574-6968.2004.tb09697.x).

- [52] Charlton, ND, Craven, KD, Mittal, S, Hopkins, AA, Young, CA. *Epichloe canadensis*, a new interspecific epichloid hybrid symbiotic with *Canada wildrye* (*Elymus canadensis*). *Mycologia* **104** (2012), 1187–1199. (doi:10.3852/11-403).
- [53] Han, K, Ji, YL, Wang, Y, Wang, ZW. A Neotyphodium endophyte from Chinese native *Festuca myuros* L. plants grown in Nanjing indicates their anamorphic relatives. *Mycology: An International Journal on Fungal Biology* (2012).
- [54] Lu, T, Wang, Z, Ji, Y, Li, X. Influences of stroma development on *Roegneria kamoji* reveal occurrence and dispersal of chemical signals in the hosts. *Symbiosis* (2012).
- [55] Zhu, M, Ren, A, Wen, W, Gao, Y. Diversity and taxonomy of endophytes from *Leymus chinensis* in the Inner Mongolia steppe of China. *FEMS Microbiology Letters* (2013).
- [56] Charlton, N, Craven, KD, Afkhami, M, Hall, B, Swoboda, G, Ghimire, SR, Young, C. Genetic diversity in epichloid endophytes of *Bromus laevipes* provides evidence for independent hybridization events. *Molecular Ecology* (2012).
- [57] Moon, CD, Craven, KD, Leuchtman, A, Clement, SL, Schardl, CL. Prevalence of interspecific hybrids amongst asexual fungal endophytes of grasses: Hybrid Fungal Endophytes. *Molecular Ecology* **13** (2004), 1455–1467. (doi:10.1111/j.1365-294X.2004.02138.x).
- [58] Leuchtman, A, Oberhofer, M. The *Epichloe* endophytes associated with the woodland grass *Hordelymus europaeus* including four new taxa. *Mycologia* **105** (2013), 1315–1324.
- [59] Mc Cargo, PD, Iannone, LJ, Vignale, MV, Schardl, CL, Rossi, MS. Species diversity of *Epichloe* symbiotic with two grasses from southern Argentinean Patagonia. *Mycologia* **106** (2014), 339–352. (doi:10.3852/106.2.339).
- [60] Yanagida, N, Irie, T, Tanaka, E, Teramoto, C, Kuwabara, K, Tajimi, A. New choke diseases and their molecular phylogenetic analysis in *Agropyron ciliare* var. *minus* and *Agropyron tsukushiense* var. *transiens*. *Mycologia* **97** (2005), 1287–1291.
- [61] Hettiarachchige, IK, Ekanayake, PN, Mann, RC, Guthridge, KM, Sawbridge, TI, Spangenberg, GC, Forster, JW. Phylogenomics of asexual *Epichloe* fungal endophytes forming associations with perennial ryegrass (*Lolium perenne* L.) *BMC Evolutionary Biology* (2015).
- [62] Moon, CD, Guillaumin, JJ, Ravel, C, Li, C, Craven, KD, Schardl, CL. New Neotyphodium endophyte species from the grass tribes Stipeae and Meliceae. *Mycologia* (2007).

- [63] Ji, Yl, Zhan, Lh, Kang, Y, Sun, Xh, Yu, Hs, Wang, Zw. A new stromata-producing Neotyphodium species symbiotic with clonal grass *Calamagrostis epigeios* (L.) Roth. grown in China. *Mycologia* **101** (2009), 200–205.
- [64] Moon, CD, Scott, B, Schardl, CL, Christensen, MJ. The evolutionary origins of Epichloë endophytes from annual ryegrasses. *Mycologia* **92** (2000), 1103–1118.
- [65] Moon, CD, Miles, CO, Jrlfors, U, Schardl, CL. The evolutionary origins of three new Neotyphodium endophyte species from grasses indigenous to the Southern Hemisphere. *Mycologia* **94** (2002), 694–711.
- [66] Iannone, LJ, Cabral, D, Schardl, CL, Rossi, MS. Phylogenetic divergence, morphological and physiological differences distinguish a new Neotyphodium endophyte species in the grass *Bromus auleticus* from South America. *Mycologia* **101** (2009), 340–351. (doi:10.3852/08-156).
- [67] Chen, Yg, Ji, Yl, Yu, Hs, Wang, Zw. A new Neotyphodium species from *Festuca parvigluma* Steud. grown in China. *Mycologia* **101** (2009), 681–685. (doi:10.3852/08-181).
- [68] Hadfield, JD, Nakagawa, S. General quantitative genetic methods for comparative biology: phylogenies, taxonomies and multi-trait models for continuous and categorical characters. *J. Evol. Biol.* **23** (2010), 494–508. (doi:10.1111/j.1420-9101.2009.01915.x).
- [69] Rafferty, NE, Ives, AR. Phylogenetic trait-based analyses of ecological networks. *Ecology* **94** (2013), 2321–2333. (doi:10.1890/12-1948.1).
- [70] Hadfield, JD, Krasnov, BR, Poulin, R, Nakagawa, S. A Tale of Two Phylogenies: Comparative Analyses of Ecological Interactions. *Am. Nat.* **183** (2014), 174–187. (doi:10.1086/674445).
- [71] Hadfield, JD. MCMC Methods for Multi-Response Generalized Linear Mixed Models: The MCMCglmm R Package. *J. Stat. Softw.* **33** (2010). (doi:10.18637/jss.v033.i02).
- [72] Hadfield, JD. *MCMCglmm Course Notes*. 2015.
- [73] Brooks, SP, Gelman, A. General Methods for Monitoring Convergence of Iterative Simulations. *Journal of Computational and Graphical Statistics* **7** (1998), 434–455. (doi:10.1080/10618600.1998.10474787).
